# Supplementary material
Source: publisher figshare collection journal article supplement (https://sage.figshare.com/ndownloader/files/20907414)
Supplement: Supplementary file 1 [file 20907414]

## Appendix (Online)

Table A1. List of Political Parties

| <b>Country</b> | <b>Party</b>                                    | <b>Country</b> | <b>Party</b>                           |
|----------------|-------------------------------------------------|----------------|----------------------------------------|
| Algeria        | National Liberation Front (FLN)                 | Jordan         | Islamic Action Front                   |
| Algeria        | National Democratic Rally (RND)                 | Jordan         | National Current Party                 |
| Algeria        | Green Algeria Alliance (AAV)                    | Jordan         | Islamic Centrist (Wasat) Party         |
| Algeria        | Socialist Forces Front (FFS)                    | Jordan         | The National Union Party               |
| Algeria        | Workers' Party (PT)                             | Jordan         | The National Congress Party (Zamzam)   |
| Bahrain        | Al Wifaq                                        | Kuwait         | Islamic Constitutional Movement        |
| Bahrain        | Al-Asala                                        | Kuwait         | Salafists                              |
| Bahrain        | al-Minbar al-Islami                             | Kuwait         | Liberals                               |
| Bahrain        | al-Rabita al-Islamiyya                          | Kuwait         | National Islamic Alliance (Shi'a)      |
| Egypt          | Free Egyptians Party (Al Masreyeen Al-Ahrar)    | Lebanon        | Hezbollah                              |
| Egypt          | Nation's Future Party (Mostakbal Watan)         | Lebanon        | Future Movement                        |
| Egypt          | New Wafd party (Al Wafd El Gadeed)              | Lebanon        | Free Patriotic Movement                |
| Egypt          | Homat Al Watan (Guards of the Homeland)         | Lebanon        | Progressive Socialist Party (Druze)    |
| Egypt          | Republican People's party (El Shaab el Gomhory) | Lebanon        | Lebanese Forces party                  |
| Iran           | The Reformists                                  | Morocco        | Justice and Development Party (PJD)    |
| Iran           | The Pragmatists                                 | Morocco        | Authenticity and Modernity Party (PAM) |
| Iran           | The Moderate Conservatives                      | Morocco        | Istiqlal Party (PI)                    |
| Iran           | The Ultra Conservatives                         | Morocco        | National Rally of Independents (RNI)   |
| Iraq           | State of Law coalition                          | Morocco        | Popular Movement (MP)                  |
| Iraq           | Sadrist Movement                                | Tunisia        | Nidaa Tounes                           |
| Iraq           | Citizens coalition (Muwatin)                    | Tunisia        | Ennahdha                               |
| Iraq           | Muttahidoon block                               | Tunisia        | Free Patriotic Union (UPL)             |
| Iraq           | Kurdistan Democratic Party (KDP)                | Tunisia        | Popular Front                          |
| Israel         | Likud                                           | Tunisia        | Afek Tounes                            |
| Israel         | Zionist Union                                   | Turkey         | Justice and Development Party (AKP)    |
| Israel         | Joint List                                      | Turkey         | Republican People's Party (CHP)        |
| Israel         | Yesh Atid (There Is a Future)                   | Turkey         | Peoples' Democratic Party (HDP)        |
| Israel         | Kulanu                                          | Turkey         | Nationalist Action Party (MHP)         |

## **Survey Questionnaire**

**Please rank each of the following political parties in Algeria on the following issue dimensions. Each issue dimension ranges from 1 to 10. The explanations of these end points (1 and 10) are specified under the title of each dimension.**

### **Social spending**

Advocates extensive social spending to redistribute income to benefit the less-privileged in society (1)

Opposes extensive social spending to redistribute income to benefit the less-privileged in society (10)

### **Role of state in governing the economy**

Favors a major role for the state in regulating private economic activity to achieve social goals, direct development, and/or maintain control over key services (1)

Advocates a minimal role for the state in regulating private economic activity to achieve social goals, direct development, and/or maintain control over key services (10)

### **Religion**

Believes that religious texts should play no role in the design and implementation of the laws (1)

Believes that the laws should conform to rules and codes of conduct presented in the religious texts (10)

### **Traditional authority, institutions, and customs**

Supports full individual freedoms from state interference into any issues related to marriage, sexuality, family life, and general social conduct (1)

Supports state-enforced compliance with traditional authorities and values on issues related to marriage, sexuality, family life, and general social conduct (10)

### **National identity**

Advocates tolerance and social and political equality for minority ethnic, linguistic, religious, and racial groups and opposes state policies that require the assimilation of such groups to the majority national culture (1)

Believes that the protection and promotion of the majority national identity and culture at the expense of minority representation are important goals (10)

### **Extremism**

Advocates harsh measures to fight terrorism and violence by non-state actors like ISIS or Al-Qaida (1)

Does not advocate strong measures to fight terrorism and violence by non-state actors like ISIS or Al-Qaida (10)

### **Transitional Justice**

Strongly supports the strict implementation of the transitional justice laws, regardless of the economic or political consequences (1)

Attributes greater priority to other economic, social, or institutional reforms. Party believes that over emphasis on transitional justice may drain resources and attention away from addressing other urgent policy issues (10)

### **Political Reforms**

Party believes democratic reforms should be implemented as soon as possible, regardless of the economic or political consequences (1)

Party believes democratic reforms should be implemented slowly, and only to the extent that they do not hinder the achievement of other important policy objectives such as economic growth and social stability (10)

### **Nuclear Deal**

Favors complete adherence to the terms of the nuclear deal (1)

Opposes the full implementation of the nuclear deal (10)

### **Role of Supreme leader**

The supreme leader should have minimal control over the executive, legislative, and judicial branches of the government (1)

The supreme leader should have full control over the executive, legislative, and judicial branches of the government (10)

**Foreign policy**

Supports maintaining a positive relationship with the U.S. on foreign policy (1)

Opposes maintaining a positive relationship with the U.S. on foreign policy (10)

**European Union**

Favors joining the European Union (1)

Opposes joining the European Union (10)

**The Sahara conflict**

Favors establishing an autonomous, self-governing territory under the control of the Moroccan monarchy (1)

Favors dividing the territory between the Moroccan state and the Western Sahara (10)

**Palestinian issue**

Favors normalizing relations with Israel, including economic and trade relations (1)

Opposes the normalization of all relations with Israel (10)

**Palestinian issue**

Favors the establishment of an independent, 100 percent sovereign Palestinian state in the West Bank and Gaza strip (1)

Opposes any form of an independent ,sovereign Palestinian state (10)

**The general left-right dimension**

Please locate each of the following parties on a general left-right dimension, taking all aspects of their policy into account.

Left (1)

Right (10)

**Table A2: Estimation and Uncertainty for Party Positions on a General Left-Right Scale**

| <b>Country</b> | <b>Party</b>                                    | <b>Mean</b> | <b>N</b> | <b>St. Dev.</b> | <b>Upper Bound</b> | <b>Lower Bound</b> |
|----------------|-------------------------------------------------|-------------|----------|-----------------|--------------------|--------------------|
| Algeria        | National Liberation Front (FLN)                 | 4.78        | 9        | 1.95            | 5.85               | 3.71               |
| Algeria        | National Democratic Rally (RND)                 | 5.22        | 9        | 2.41            | 6.54               | 3.9                |
| Algeria        | Green Algeria Alliance (AAV)                    | 6.13        | 8        | 2.4             | 7.52               | 4.73               |
| Algeria        | Socialist Forces Front (FFS)                    | 3.22        | 9        | 1.37            | 3.97               | 2.47               |
| Algeria        | Workers' Party (PT)                             | 1.56        | 9        | 0.84            | 2.02               | 1.09               |
| Bahrain        | Al Wifaq                                        | 5.2         | 10       | 2.53            | 6.52               | 3.88               |
| Bahrain        | Al-Asala                                        | 8           | 7        | 3.63            | 10.25              | 5.75               |
| Bahrain        | al-Minbar al-Islami                             | 7.63        | 8        | 3.03            | 9.39               | 5.86               |
| Bahrain        | al-Rabita al-Islamiyya                          | 8.33        | 3        | 4.35            | 12.46              | 4.2                |
| Egypt          | Free Egyptians Party (Al Masreyeen Al-Ahrar)    | 6.64        | 11       | 2.84            | 8.05               | 5.23               |
| Egypt          | Nation's Future Party (Mostakbal Watan)         | 7.89        | 9        | 3.11            | 9.59               | 6.19               |
| Egypt          | New Wafd party (Al Wafd El Gadeed)              | 6.27        | 11       | 2.99            | 7.76               | 4.79               |
| Egypt          | Homat Al Watan (Guards of the Homeland)         | 9.2         | 5        | 3.88            | 12.06              | 6.34               |
| Egypt          | Republican People's party (El Shaab el Gomhory) | 8.5         | 4        | 4.15            | 11.91              | 5.09               |
| Iran           | The Reformists                                  | 3.33        | 12       | 1.32            | 3.96               | 2.71               |
| Iran           | The Pragmatists                                 | 5.83        | 12       | 2.26            | 6.9                | 4.76               |
| Iran           | The Moderate Conservatives                      | 7.09        | 11       | 2.35            | 8.26               | 5.92               |
| Iran           | The Ultra Conservatives                         | 9           | 12       | 2.69            | 10.28              | 7.72               |
| Iraq           | State of Law coalition                          | 7.75        | 8        | 2.98            | 9.48               | 6.02               |
| Iraq           | Sadrist Movement                                | 6.38        | 8        | 3.39            | 8.35               | 4.4                |
| Iraq           | Citizens coalition (Muwatin)                    | 7.14        | 7        | 2.96            | 8.99               | 5.3                |
| Iraq           | Muttahidoon block                               | 6.33        | 6        | 2.99            | 8.34               | 4.32               |
| Iraq           | Kurdistan Democratic Party (KDP)                | 7.25        | 8        | 3.13            | 9.07               | 5.43               |
| Israel         | Likud                                           | 8.43        | 14       | 2.42            | 9.49               | 7.37               |
| Israel         | Zionist Union                                   | 5.29        | 14       | 2.55            | 6.41               | 4.17               |
| Israel         | Joint List                                      | 2.54        | 13       | 1.86            | 3.39               | 1.69               |
| Israel         | Yesh Atid (There Is a Future)                   | 5.92        | 13       | 2.38            | 7.01               | 4.84               |
| Israel         | Kulanu                                          | 6.85        | 13       | 2.27            | 7.88               | 5.81               |
| Jordan         | Islamic Action Front                            | 7.4         | 5        | 3.19            | 9.75               | 5.05               |
| Jordan         | National Current Party                          | 5.83        | 6        | 2.83            | 7.73               | 3.93               |
| Jordan         | Islamic Centrist (Wasat) Party                  | 7           | 5        | 3.19            | 9.35               | 4.65               |
| Jordan         | The National Union Party                        | 5.2         | 5        | 2.88            | 7.32               | 3.08               |
| Jordan         | The National Congress Party (Zamzam)            | 7           | 5        | 3.19            | 9.35               | 4.65               |
| Kuwait         | Islamic Constitutional Movement                 | 6.56        | 9        | 2.51            | 7.93               | 5.18               |
| Kuwait         | Salafists                                       | 7.78        | 9        | 2.79            | 9.31               | 6.25               |
| Kuwait         | Liberals                                        | 4.5         | 10       | 2.26            | 5.67               | 3.33               |
| Kuwait         | National Islamic Alliance (Shi'a)               | 5.78        | 9        | 2.1             | 6.93               | 4.63               |
| Lebanon        | Hezbollah                                       | 4.8         | 15       | 2.53            | 5.87               | 3.73               |
| Lebanon        | Future Movement                                 | 7.33        | 15       | 2.28            | 8.3                | 6.37               |
| Lebanon        | Free Patriotic Movement                         | 6.93        | 14       | 2.61            | 8.08               | 5.78               |
| Lebanon        | Progressive Socialist Party (Druze)             | 4.4         | 15       | 2.42            | 5.43               | 3.37               |
| Lebanon        | Lebanese Forces party                           | 8           | 16       | 2.55            | 9.05               | 6.95               |
| Morocco        | Justice and Development Party (PJD)             | 7.07        | 14       | 2.56            | 8.2                | 5.95               |
| Morocco        | Authenticity and Modernity Party (PAM)          | 7           | 12       | 2.3             | 8.09               | 5.91               |
| Morocco        | Istiqlal Party (PI)                             | 6.92        | 13       | 2.14            | 7.9                | 5.95               |
| Morocco        | National Rally of Independents (RNI)            | 7.67        | 12       | 2.53            | 8.87               | 6.46               |
| Morocco        | Popular Movement (MP)                           | 6.42        | 12       | 2.56            | 7.63               | 5.2                |
| Tunisia        | Nidaa Tounes                                    | 6.67        | 15       | 2.46            | 7.71               | 5.62               |
| Tunisia        | Ennahdha                                        | 6.53        | 15       | 2.36            | 7.54               | 5.53               |
| Tunisia        | Free Patriotic Union (UPL)                      | 6.31        | 13       | 2.38            | 7.39               | 5.22               |
| Tunisia        | Popular Front                                   | 2.73        | 15       | 2.1             | 3.62               | 1.84               |
| Tunisia        | Afek Tounes                                     | 4.92        | 13       | 2.38            | 6.01               | 3.84               |
| Turkey         | Justice and Development Party (AKP)             | 8.47        | 38       | 1.71            | 8.93               | 8.02               |
| Turkey         | Republican People's Party (CHP)                 | 4.32        | 38       | 1.34            | 4.67               | 3.96               |
| Turkey         | Peoples' Democratic Party (HDP)                 | 2.36        | 39       | 0.94            | 2.61               | 2.11               |
| Turkey         | Nationalist Action Party (MHP)                  | 9.21        | 39       | 1.86            | 9.7                | 8.72               |
